# Supplementary material
Source: PubMed Central journal article supplement (PMC5851145)
Supplement: JCB702669_supplementary_material1.pdf [file JCB702669_supplementary_material1.pdf]

## **SUPPLEMENTAL MATERIAL**

### **Supplementary Figure 1**

Chronology of experimental design illustrating the timepoints of Wnt-3a treatment and behavior tests.

### **Supplementary Figure 2**

Comparison of contralateral vs. ipsilateral (relative to the lesion side) forepaw contact and removal at 14 days post-stroke. No differences in latencies to contact or removal were observed in ipsilateral forepaw performance.
