# Supplementary material
Source: PubMed Central journal article supplement (PMC5851145)

Supplemental Figure 1  
Wei et al.

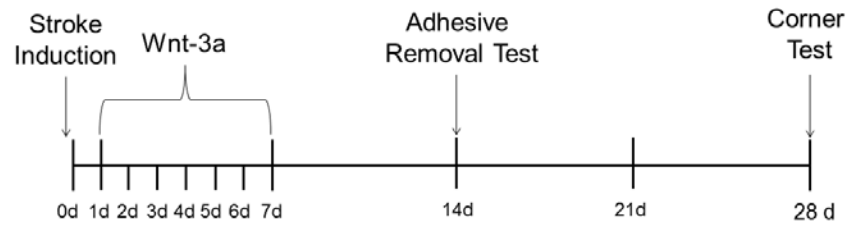

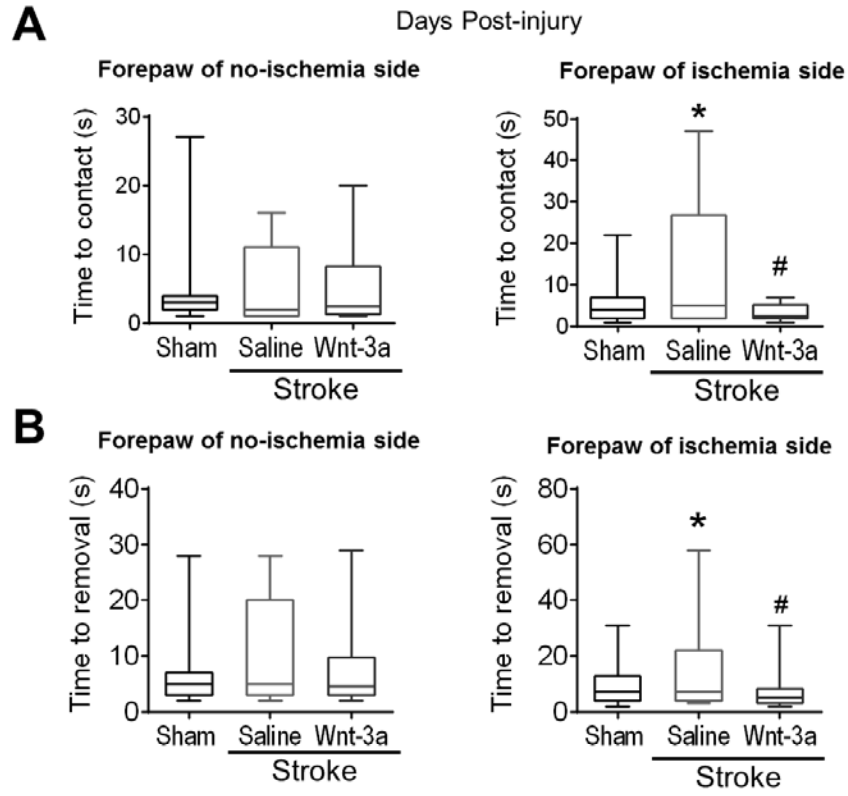

Supplement: JCB702669_supplementary_material2.pdf [file JCB702669_supplementary_material2.pdf]
